# Supplementary material for: A qualitative investigation of the relevance of skin irritation and self-confidence bolt-ons and their conceptual overlap with the EQ-5D in patients with psoriasis
Source: Springer Nature journal article supplement (doi:10.1007/s11136-022-03141-y), 2022-04-26
Supplement: MOESM1 [file 11136_2022_3141_MOESM1_ESM.pdf]

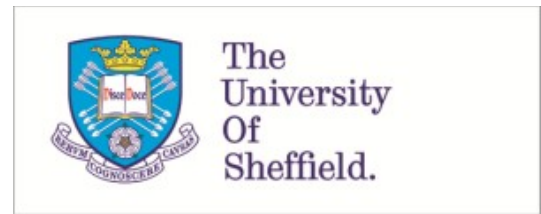

This is a repository copy of *A qualitative investigation of the relevance of skin irritation and self-confidence bolt-ons and their conceptual overlap with the EQ-5D in patients with psoriasis.*

White Rose Research Online URL for this paper:

<https://eprints.whiterose.ac.uk/186226/>

Version: Supplemental Material

---

**Article:**

Rencz, F., Mukuria, C. [orcid.org/0000-0003-4318-1481](https://orcid.org/0000-0003-4318-1481), Bató, A. et al. (2 more authors) (2022) A qualitative investigation of the relevance of skin irritation and self-confidence bolt-ons and their conceptual overlap with the EQ-5D in patients with psoriasis. *Quality of Life Research*, 31 (10). pp. 3049-3060. ISSN 0962-9343

<https://doi.org/10.1007/s11136-022-03141-y>

---

**Reuse**

Items deposited in White Rose Research Online are protected by copyright, with all rights reserved unless indicated otherwise. They may be downloaded and/or printed for private study, or other acts as permitted by national copyright laws. The publisher or other rights holders may allow further reproduction and re-use of the full text version. This is indicated by the licence information on the White Rose Research Online record for the item.

**Takedown**

If you consider content in White Rose Research Online to be in breach of UK law, please notify us by emailing [eprints@whiterose.ac.uk](mailto:eprints@whiterose.ac.uk) including the URL of the record and the reason for the withdrawal request.

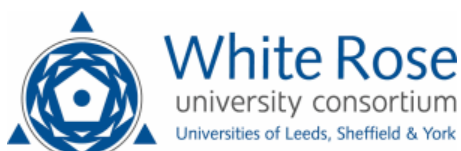

[eprints@whiterose.ac.uk](mailto:eprints@whiterose.ac.uk)  
<https://eprints.whiterose.ac.uk/>

## **Supplementary Information**

### **A qualitative investigation of the relevance of skin irritation and self-confidence bolt-ons and their conceptual overlap with the EQ-5D in patients with psoriasis**

Fanni Rencz, Clara Mukuria, Alex Bató, Adrienn Katalin Poór, Aureliano Paolo Finch

#### **Correspondence:**

Dr Fanni Rencz

Department of Health Economics  
Corvinus University of Budapest  
Address: 8 Fővám tér, H-1093 Budapest, Hungary  
E-mail: fanni.rencz@uni-corvinus.hu

**Online Resource 1** Comments on response levels

**Online Resource 2** Content of the EQ VAS

### Online Resource 1 Comments on response levels

| Themes                                                | Dimension  | n | %   | Example quote                                                                                                                                                                                                                                                                                                                |
|-------------------------------------------------------|------------|---|-----|------------------------------------------------------------------------------------------------------------------------------------------------------------------------------------------------------------------------------------------------------------------------------------------------------------------------------|
| <b><u>REFRAMED THE RESPONSE LEVELS</u></b>            |            |   |     |                                                                                                                                                                                                                                                                                                                              |
| Reframed as a frequency scale                         | MO         | 3 | 19% | 010: Mostly I marked 'slight problems' because this replaces rare for me.                                                                                                                                                                                                                                                    |
|                                                       | PD         | 3 | 19% | 010: Because it is very rare and that is rather mild.                                                                                                                                                                                                                                                                        |
|                                                       | SI         | 2 | 13% | 006: I know the phases, when it is moderate and when severe. I take it as 'severe' when it itches more often.                                                                                                                                                                                                                |
| Reframed as 'level of bother'                         | MO, SC, UA | 1 | 6%  | 011: I felt from the questionnaire that the first part is about [activities] that you can or cannot do, you can or cannot get dressed ... but obviously we [psoriasis patients] can do it, so am I, but if it bothers me in any activity there is a lot more here, it bothers me very-very much in a lot, lot of activities. |
| <b><u>REPORTED PROBLEMS WITH LEVEL MODIFIERS</u></b>  |            |   |     |                                                                                                                                                                                                                                                                                                                              |
| Too difficult to differentiate between levels 1 and 2 | MO         | 2 | 13% | P002: Here I can mark more than one, because it does not limit so much to say 'slight'.                                                                                                                                                                                                                                      |
| Too difficult to differentiate between levels 4 and 5 | PD         | 1 | 6%  | 001: Concerning such subjective topics as discomfort... it is hard for me to make a difference [between levels 4 and 5] ... for me both answers are equal so they would have the same weight.                                                                                                                                |
|                                                       | AD         | 1 | 6%  | 001: I am very anxious, I am extremely anxious, so where are the differences between the levels? I am severely depressed or extremely depressed, it would be hard for me to make any difference.                                                                                                                             |
|                                                       | SI         | 2 | 13% | 011: For me, between extreme and severe, it is really interesting, but severe comes last [instead of extreme].                                                                                                                                                                                                               |
| Mild depression is a clinical diagnosis               | AD         | 1 | 6%  | 002: According to my clinical condition, I have a mild depressive episode and mixed anxiety-depressive disorder.                                                                                                                                                                                                             |
| 'Moderate' or 'medium' [Hungarian-specific]           | PD, AD     | 1 | 6%  | 001: It [the questionnaire] uses similar words everywhere and here earlier I wondered a little for a moment why it did not put it that way that 'I am medium-anxious' or 'I am medium-depressed' there is no such thing as being 'moderately depressed'?                                                                     |
| <b><u>SUGGESTED A CHANGE</u></b>                      |            |   |     |                                                                                                                                                                                                                                                                                                                              |
| Increase the number of response levels                | MO         | 1 | 6%  | 010: It suddenly came to my mind that sometimes a sort of 10-point scale is used in certain situations, perhaps that might be better.                                                                                                                                                                                        |
| More information next to the response levels          | PD         | 1 | 6%  | 004: I would explain it a bit in parentheses what slight, moderate and severe mean.                                                                                                                                                                                                                                          |

AD = anxiety/depression, CO = self-confidence, MO = mobility, PD = pain/discomfort, SC = self-care, SI = skin irritation, UA = usual activities.

## Online Resource 2 Content of the EQ VAS

| Theme                                          | n | %   | Example quote                                                                                                                                                                                                                               |
|------------------------------------------------|---|-----|---------------------------------------------------------------------------------------------------------------------------------------------------------------------------------------------------------------------------------------------|
| <b><i>THE BEST HEALTH YOU CAN IMAGINE</i></b>  |   |     |                                                                                                                                                                                                                                             |
| <b>In general</b>                              |   |     |                                                                                                                                                                                                                                             |
| Lack of pain                                   | 4 | 25% | 004: Yes, it would be 100 if I did not have any pain                                                                                                                                                                                        |
| Healthy lifestyle (e.g. sport, diet)           | 3 | 19% | P002: One does sport regularly, eats properly and is happy.                                                                                                                                                                                 |
| Youth                                          | 3 | 19% | 005: Well, the best imaginable health, you know, has many components, one of them is having a very good health, for that you have to be a bit younger                                                                                       |
| Lack of illness (in general)                   | 2 | 13% | 007: I would not have any problem not even age-related diseases                                                                                                                                                                             |
| Free of symptoms/free of health complaints     | 2 | 13% | 002: I am completely free of symptoms and I have already forgotten that I had an experience like that with a disease                                                                                                                        |
| Unachievable                                   | 2 | 13% | 012: There is no man on earth who is fit as a fiddle who was born lucky and 100% virus-free, disease-free, there is nothing wrong with him, has never been sick... 80-85 let's agree, I think that's the normal health of an average person |
| Happiness                                      | 1 | 6%  | P002: The best, who is obviously young, does sport regularly, eats properly and is happy.                                                                                                                                                   |
| Health or well-being of my family              | 1 | 6%  | 009: My health today is 100... Since everything was fine, my child is in a good place, I talked with the other two [children]                                                                                                               |
| No need for using healthcare                   | 1 | 6%  | 013: One does not need to visit the doctor or hospital                                                                                                                                                                                      |
| No discomfort, harmony                         | 1 | 6%  | 005: If someone feels good and is balanced that is a very good thing                                                                                                                                                                        |
| Lack of anxiety                                | 1 | 6%  | 006: I have nothing to be anxious about...                                                                                                                                                                                                  |
| Physical health, vitality                      | 1 | 6%  | 001: When one feels so well in one's skin, and feels vital, that the word 'health' does not even go through their mind.                                                                                                                     |
| Physical and mental health                     | 1 | 6%  | 014: As long as someone is young and does not even know how good it is because they do not feel what it is like to always have pain somewhere. I don't know if mental health belongs here, because that is the other side                   |
| <b>In relation to psoriasis</b>                |   |     |                                                                                                                                                                                                                                             |
| I have no skin symptoms                        | 3 | 19% | 004: It would be 100 if, on the one hand, I did not have any pain, I were free of symptoms, so my scalp were not flaking regardless of having it [psoriasis], it did itch in every hour and were not painful or cracking                    |
| I do not have psoriasis                        | 2 | 13% | 003: Not to have psoriasis, so to get rid of this problem                                                                                                                                                                                   |
| <b><i>THE WORST HEALTH YOU CAN IMAGINE</i></b> |   |     |                                                                                                                                                                                                                                             |
| <b>In general</b>                              |   |     |                                                                                                                                                                                                                                             |
| Unable to take care oneself                    | 6 | 38% | 013: Complete dependency on others, when one is unconscious, they have to wear a diaper, have to be fed and washed                                                                                                                          |
| Paralyzed/disabled                             | 3 | 19% | 004: Well, when I am not even able to stand up...                                                                                                                                                                                           |
| Extreme pain                                   | 3 | 19% | 001: When someone thinks 'shoot me in the head', because even existence means a problem, there is that level of pain...                                                                                                                     |
| Severe/deadly disease                          | 3 | 19% | P001: If someone has a deadly disease e.g. cancer or after having a stroke or heart attack                                                                                                                                                  |
| Dying                                          | 2 | 13% | 003: Shall I say now if someone is dying?                                                                                                                                                                                                   |
| Poor mental health                             | 2 | 13% | 009: It is an anxiety because of something ... I would rather say it for a mental state, there I could mark a 0.                                                                                                                            |
| Depression, panic disorder                     | 1 | 6%  | 010: If I had a bad depression because of this, that would be the worst                                                                                                                                                                     |
| Grief                                          | 1 | 6%  | 009: on the day of my father's funeral... that morning, yes, if I had to answer to something like this then for sure [would have marked 0]                                                                                                  |
| Dead                                           | 1 | 6%  | 007: When someone is already in the coffin.                                                                                                                                                                                                 |
| Worse than dead                                | 1 | 6%  | P001: For example, to be physically paralyzed, not able to walk or anything, this is worse than dead, in my opinion.                                                                                                                        |
| <b>In relation to psoriasis</b>                |   |     |                                                                                                                                                                                                                                             |
| My whole body would be covered with psoriasis  | 2 | 13% | 011: If one's whole body was covered [with psoriasis]                                                                                                                                                                                       |
